# Supplementary material for: High NCALD expression predicts poor prognosis of cytogenetic normal acute myeloid leukemia
Source: PubMed Central journal article supplement (PMC6528257; doi:10.1186/s12967-019-1904-5), 2019-05-20

## Additional file 2: Figure S1

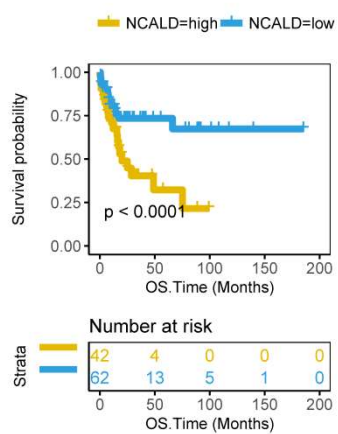

# Additional file 2: Figure S2

**A**

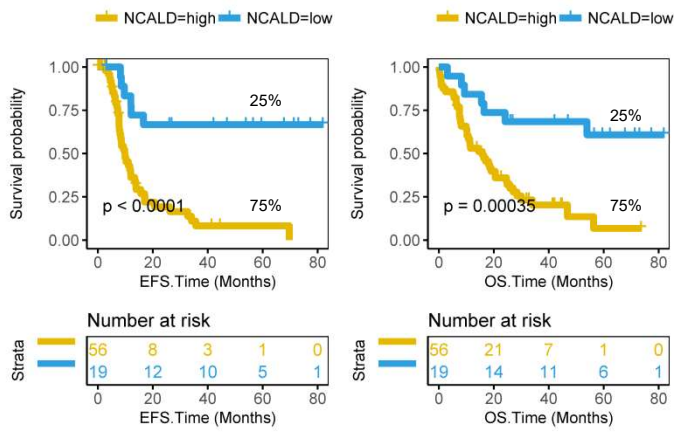

**B**

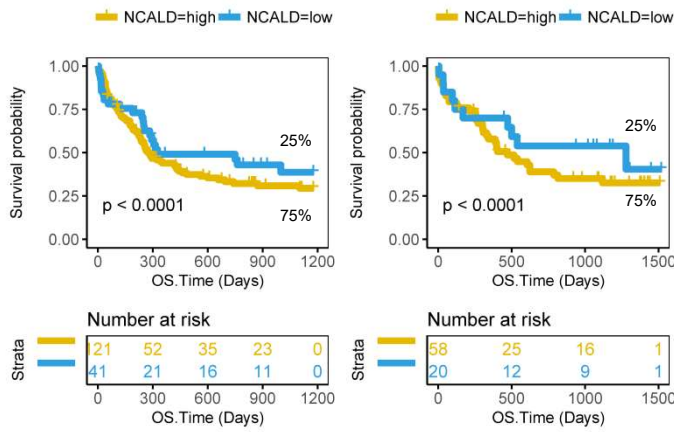

**C**

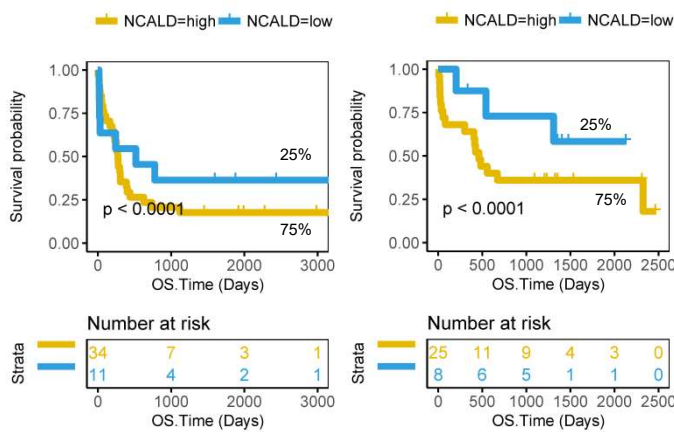

## Additional file 2: Figure S3

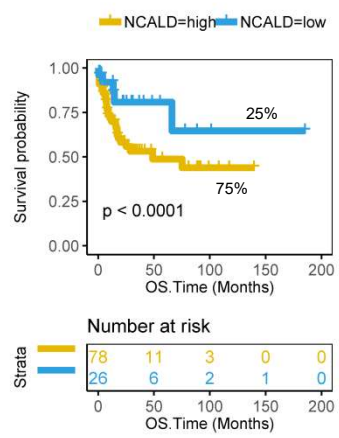



## Additional file 2: Figure S5

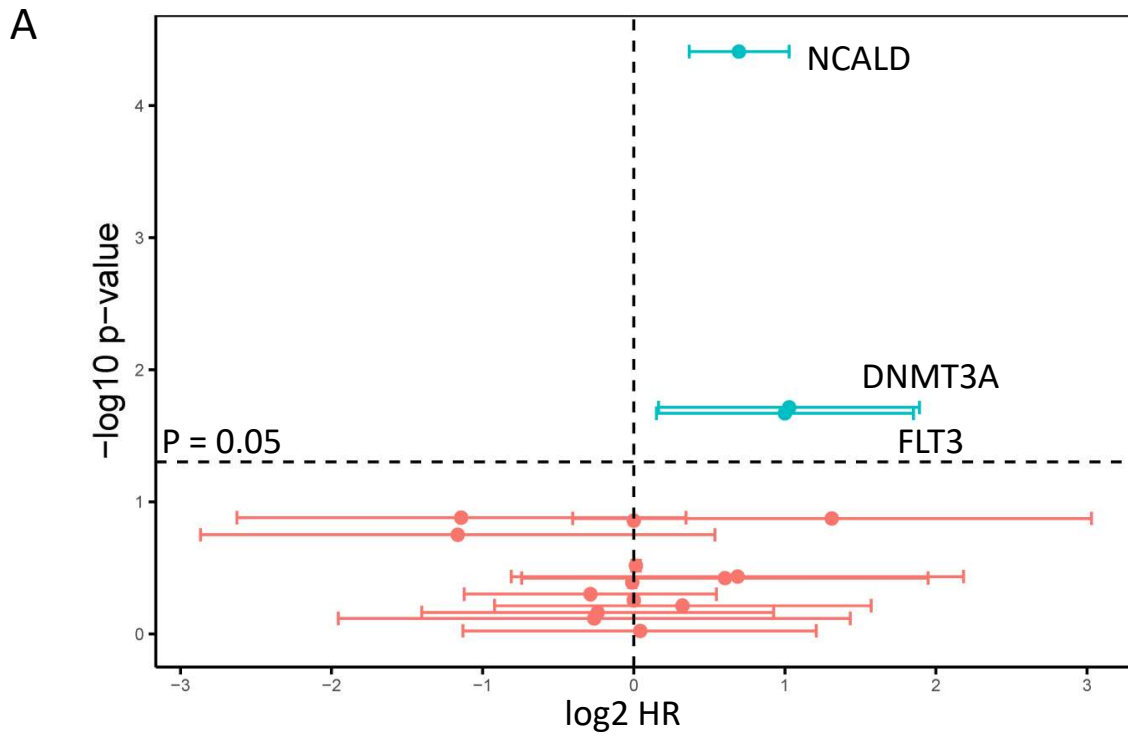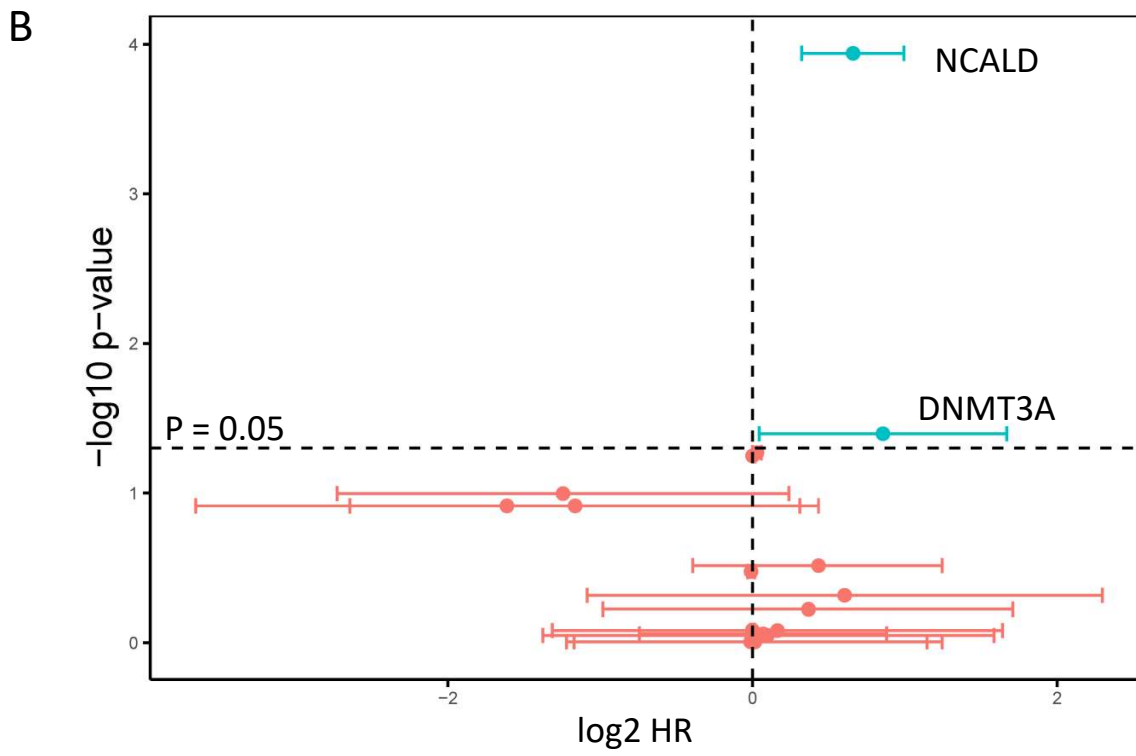

**Additional file 2: Figure S6**

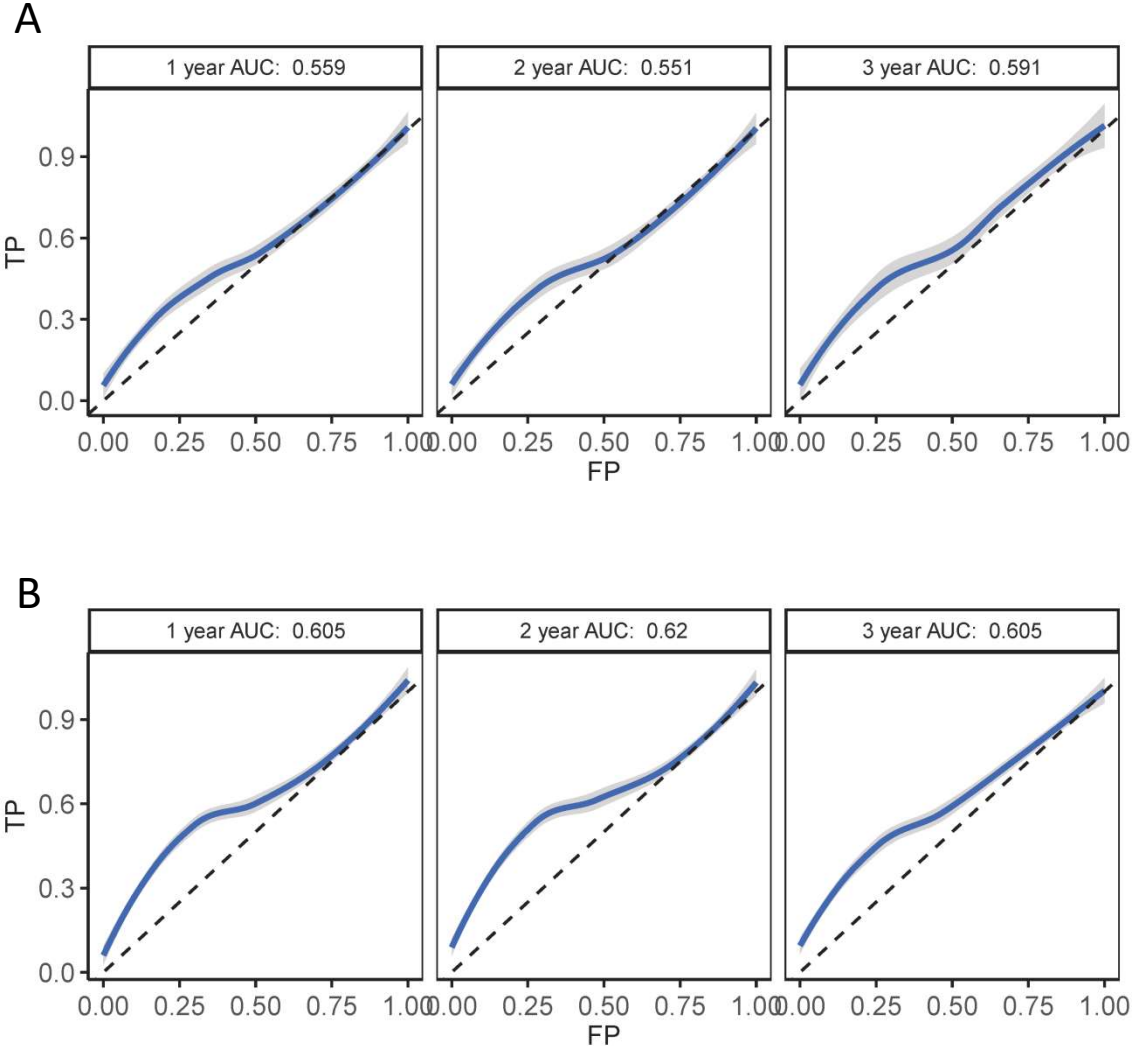

**Additional file 2: Figure S7**

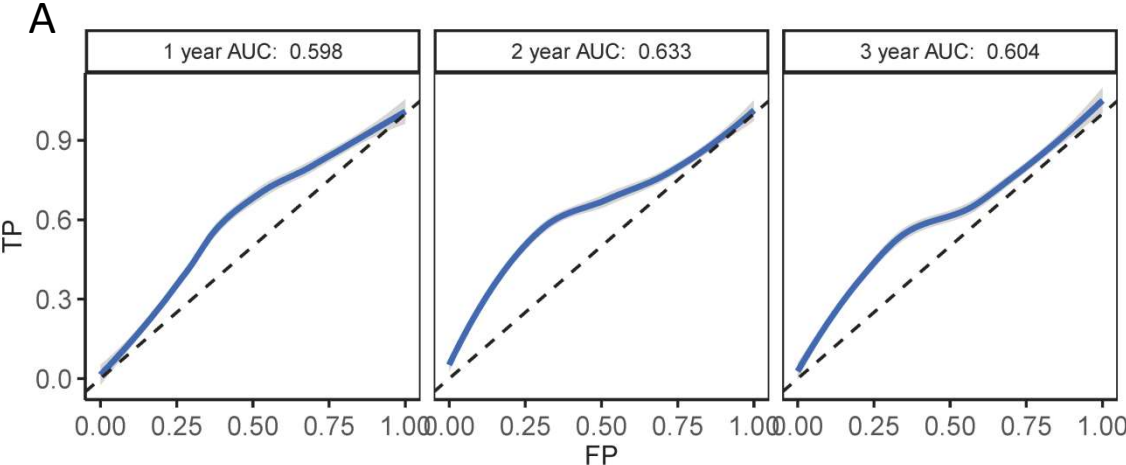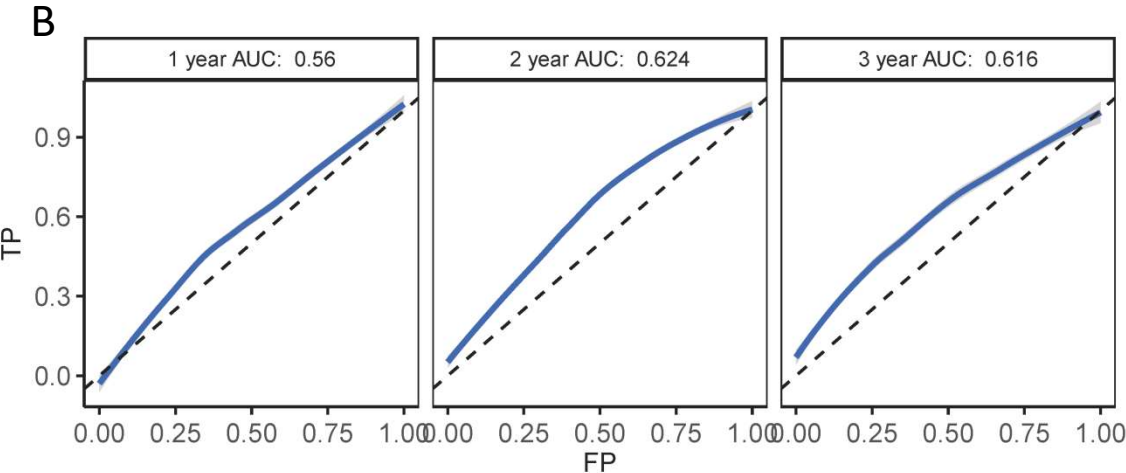

# Additional file 2: Figure S8

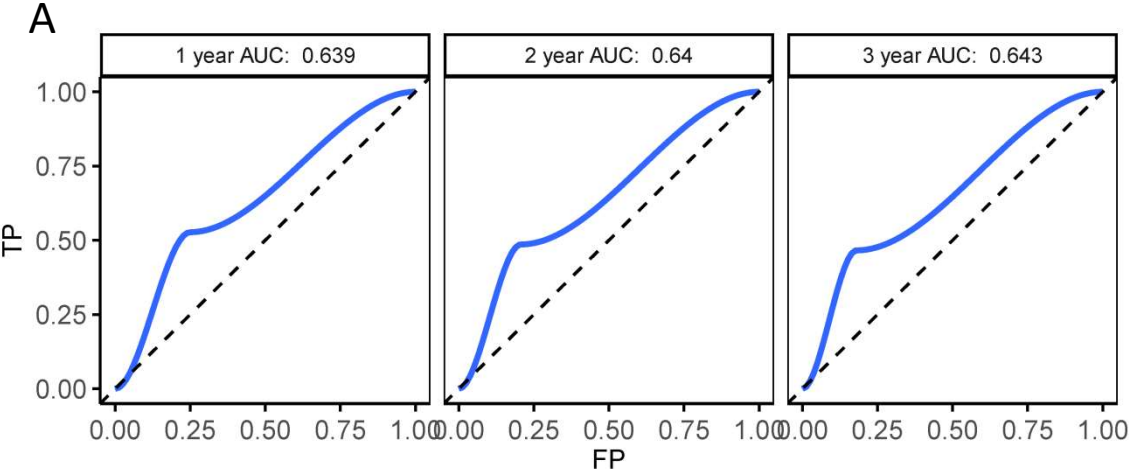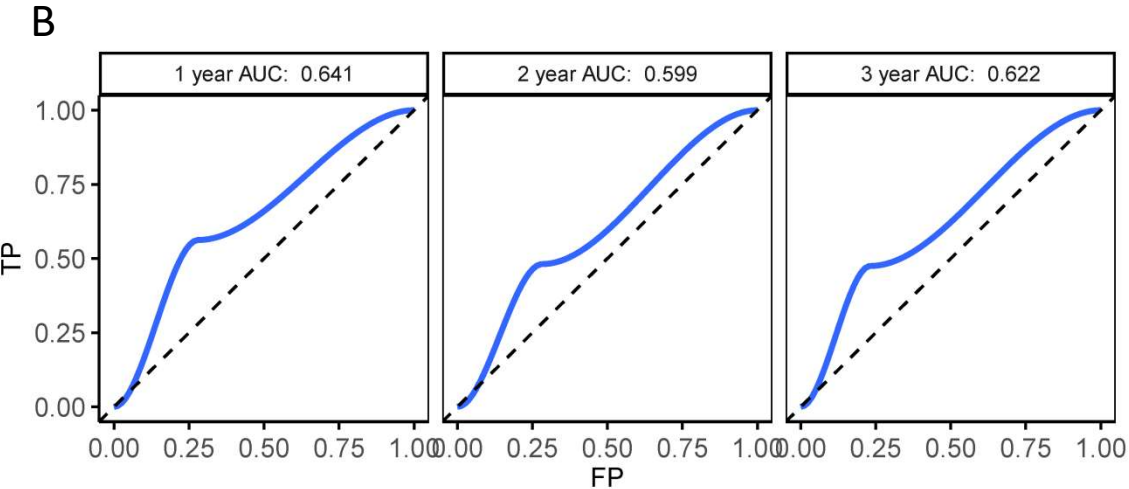



## Additional file 2: Figure S9

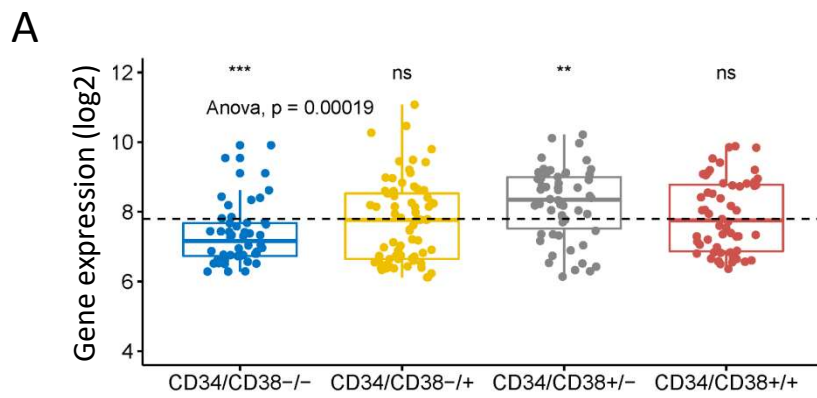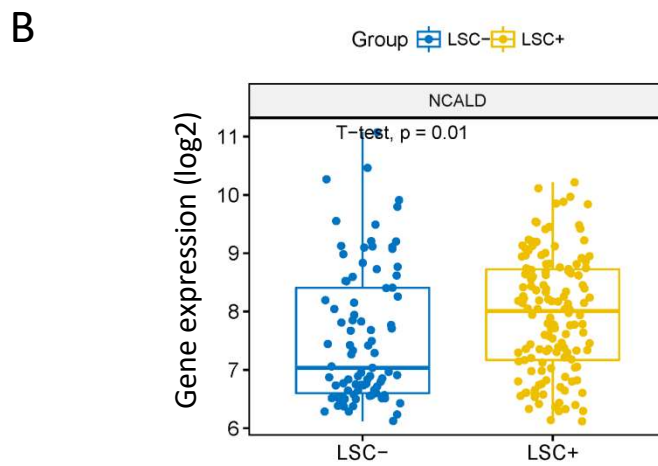

Supplement: 12967_2019_1904_MOESM2_ESM.pdf [file 12967_2019_1904_MOESM2_ESM.pdf]
